# Supplementary material for: Sexually transmitted infections (STI) and antenatal care (ANC) clinics in Malawi: effective platforms for improving engagement of men at high HIV risk with voluntary medical male circumcision services
Source: PubMed Central journal article supplement — Sex Transm Infect. 2021 Jan 4;97(5):345–50. doi: 10.1136/sextrans-2020-054776 (PMC8311083; doi:10.1136/sextrans-2020-054776), 2021-01-04
Supplement: sextrans-2020-054776supp001.pdf [file sextrans-2020-054776supp001.pdf]

**ANC/STI Clinic Referral Raw Data****MC's by month, Bwaila Clinic**

| <b>MCs Performed - Bwaila Clinic</b> |             |             |
|--------------------------------------|-------------|-------------|
| <b>Month</b>                         | <b>2017</b> | <b>2018</b> |
| November                             | 191         | 408         |
| December                             | 107         | 140         |
| January                              | 169         | 222         |
| February                             | 122         | 217         |
| March                                | 224         | 156         |
| April                                | 194         | 464         |
| May                                  | 258         | 475         |
| June                                 | 628         | 274         |
| July                                 | 211         | 587         |
| August                               | 1105        | 869         |
| September                            | 166         | 193         |
| October                              | 172         | 76          |
| <b>Total</b>                         | <b>3547</b> | <b>4081</b> |
| Total Nov-Sept                       | 3375        | 4005        |

| <b>ANC &amp; STI CLIENTS AT BWAILA VMMC CLINIC BY BASELINE CIRCUMCISION STATUS</b> |                   |               |            |                         |                   |               |            |                         |
|------------------------------------------------------------------------------------|-------------------|---------------|------------|-------------------------|-------------------|---------------|------------|-------------------------|
| <b>Month</b>                                                                       | <b>ANC Clinic</b> |               |            |                         | <b>STI Clinic</b> |               |            |                         |
|                                                                                    | Circumcised       | Uncircumcised | Unknown    | Total Presenting at ANC | Circumcised       | Uncircumcised | Unknown    | Total Presenting at STI |
| Oct-18                                                                             |                   |               |            |                         |                   |               |            |                         |
| Nov-18                                                                             | 51                | 18            | 87         | 156                     | 176               | 120           | 162        | 458                     |
| Dec-18                                                                             | 69                | 147           | 204        | 420                     | 114               | 77            | 127        | 318                     |
| Jan-19                                                                             | 98                | 94            | 75         | 267                     | 104               | 114           | 260        | 478                     |
| Feb-19                                                                             | 99                | 50            | 72         | 221                     | 177               | 77            | 0          | 254                     |
| Mar-19                                                                             | 99                | 91            | 0          | 190                     | 118               | 235           | 0          | 353                     |
| Apr-19                                                                             | 91                | 104           | 3          | 198                     | 140               | 101           | 0          | 241                     |
| May-19                                                                             | 88                | 129           | 34         | 251                     | 223               | 53            | 0          | 276                     |
| Jun-19                                                                             | 95                | 99            | 0          | 194                     | 150               | 16            | 0          | 166                     |
| Jul-19                                                                             | 95                | 117           | 8          | 220                     | 141               | 106           | 0          | 247                     |
| Aug-19                                                                             | 86                | 80            | 22         | 188                     | 185               | 5             | 0          | 190                     |
| Sep-19                                                                             | 32                | 55            | 11         | 98                      | 67                | 0             | 0          | 67                      |
| Oct-19                                                                             | 41                | 38            | 1          | 80                      | 134               | 0             | 0          | 134                     |
| <b>Total</b>                                                                       | <b>944</b>        | <b>1022</b>   | <b>517</b> | <b>2483</b>             | <b>1729</b>       | <b>904</b>    | <b>549</b> | <b>3182</b>             |

## Client Cascades, STI and ANC clinics

| Month        | Number of Males Presenting to STI Clinic | # of uncircumcised male patients counselled on VMMC benefits at STI Clinic | Number of Males engaged through STI clinic who received MC | Total MCs done at Bwaila Clinic | Proportion of ALL STI Clients who received Circumcision | Proportion of counselled males who received circumcision | Contribution of STI Clinic to Total Bwaila MCs | Number of MCs done through standard mobilization |
|--------------|------------------------------------------|----------------------------------------------------------------------------|------------------------------------------------------------|---------------------------------|---------------------------------------------------------|----------------------------------------------------------|------------------------------------------------|--------------------------------------------------|
| Nov-18       | 458                                      | 120                                                                        | 22                                                         | 408                             | 5%                                                      | 18%                                                      | 5%                                             | 386                                              |
| Dec-18       | 318                                      | 77                                                                         | 20                                                         | 140                             | 6%                                                      | 26%                                                      | 14%                                            | 120                                              |
| Jan-19       | 478                                      | 114                                                                        | 28                                                         | 222                             | 6%                                                      | 25%                                                      | 13%                                            | 194                                              |
| Feb-19       | 254                                      | 254                                                                        | 19                                                         | 217                             | 7%                                                      | 7%                                                       | 9%                                             | 198                                              |
| Mar-19       | 353                                      | 352                                                                        | 11                                                         | 156                             | 3%                                                      | 3%                                                       | 7%                                             | 145                                              |
| Apr-19       | 241                                      | 235                                                                        | 24                                                         | 464                             | 10%                                                     | 10%                                                      | 5%                                             | 440                                              |
| May-19       | 276                                      | 264                                                                        | 23                                                         | 475                             | 8%                                                      | 9%                                                       | 5%                                             | 452                                              |
| Jun-19       | 166                                      | 160                                                                        | 23                                                         | 274                             | 14%                                                     | 14%                                                      | 8%                                             | 251                                              |
| Jul-19       | 247                                      | 174                                                                        | 26                                                         | 587                             | 11%                                                     | 15%                                                      | 4%                                             | 561                                              |
| Aug-19       | 190                                      | 133                                                                        | 23                                                         | 869                             | 12%                                                     | 17%                                                      | 3%                                             | 846                                              |
| Sep-19       | 67                                       | 47                                                                         | 10                                                         | 193                             | 15%                                                     | 21%                                                      | 5%                                             | 183                                              |
| Oct-19       | 134                                      | 67                                                                         | 13                                                         | 76                              | 10%                                                     | 19%                                                      | 17%                                            | 63                                               |
| <b>Total</b> | <b>3182</b>                              | <b>1997</b>                                                                | <b>242</b>                                                 | <b>4081</b>                     | <b>8%</b>                                               | <b>12%</b>                                               |                                                |                                                  |

| Month        | Number of Males Presenting to ANC Clinic | # of uncircumcised male patients counselled on VMMC benefits at ANC Clinic | Number of Males engaged through ANC clinic who received MC | Total MCs done at Bwaila Clinic | Proportion of ALL ANC Clients who received Circumcision | Proportion of males counselled in ANC who received circumcision | Contribution of ANC Clinic to Total Bwaila MCs | Number of MCs done through standard mobilization |
|--------------|------------------------------------------|----------------------------------------------------------------------------|------------------------------------------------------------|---------------------------------|---------------------------------------------------------|-----------------------------------------------------------------|------------------------------------------------|--------------------------------------------------|
| Nov-18       | 156                                      | 18                                                                         | 9                                                          | 408                             | 6%                                                      | 50%                                                             | 2%                                             | 399                                              |
| Dec-18       | 420                                      | 147                                                                        | 12                                                         | 140                             | 3%                                                      | 8%                                                              | 9%                                             | 128                                              |
| Jan-19       | 267                                      | 94                                                                         | 7                                                          | 222                             | 3%                                                      | 7%                                                              | 3%                                             | 215                                              |
| Feb-19       | 221                                      | 50                                                                         | 4                                                          | 217                             | 2%                                                      | 8%                                                              | 2%                                             | 213                                              |
| Mar-19       | 190                                      | 91                                                                         | 2                                                          | 156                             | 1%                                                      | 2%                                                              | 1%                                             | 154                                              |
| Apr-19       | 198                                      | 104                                                                        | 4                                                          | 464                             | 2%                                                      | 4%                                                              | 1%                                             | 460                                              |
| May-19       | 251                                      | 129                                                                        | 9                                                          | 475                             | 4%                                                      | 7%                                                              | 2%                                             | 466                                              |
| Jun-19       | 194                                      | 99                                                                         | 9                                                          | 274                             | 5%                                                      | 9%                                                              | 3%                                             | 265                                              |
| Jul-19       | 220                                      | 117                                                                        | 13                                                         | 587                             | 6%                                                      | 11%                                                             | 2%                                             | 574                                              |
| Aug-19       | 188                                      | 80                                                                         | 10                                                         | 869                             | 5%                                                      | 13%                                                             | 1%                                             | 859                                              |
| Sep-19       | 98                                       | 55                                                                         | 7                                                          | 193                             | 7%                                                      | 13%                                                             | 4%                                             | 186                                              |
| Oct-19       | 80                                       | 38                                                                         | 2                                                          | 76                              | 3%                                                      | 5%                                                              | 3%                                             | 74                                               |
| <b>Total</b> | <b>2483</b>                              | <b>1022</b>                                                                | <b>88</b>                                                  | <b>4081</b>                     | <b>4%</b>                                               | <b>9%</b>                                                       | <b>2%</b>                                      | <b>3993</b>                                      |

## VMMC Client Risk Behavior Survey Responses Line List

| Referral Source | Age | Age Category | Date      | Q1. Have you received treatment for a sexually transmitted infection (or symptoms) in the last six months? | Q2. In the last 6 months, did you pay or receive payment with money, a favor, food, or material goods in exchange for sex? | Q3. In the last six months, did you have sex with someone who is not a regular sex partner without using a condom? | Q4. In the last 6 months, have you had sex with a partner that you knew was HIV-positive? | Q5. In the last 6 months, was there ever a period when you had more than two regular sex partners? | Q6. In the last 6 months, have you had sex when you or your partner were drunk? | Q7. In the last 6 months, have you used drugs (e.g., smoked dagga, taken ecstasy, used marijuana or cocaine) before sex? | Q8. Did the participant indicate "yes" to at least one of the questions? | Risk Level | At least One Risk | Risk |
|-----------------|-----|--------------|-----------|------------------------------------------------------------------------------------------------------------|----------------------------------------------------------------------------------------------------------------------------|--------------------------------------------------------------------------------------------------------------------|-------------------------------------------------------------------------------------------|----------------------------------------------------------------------------------------------------|---------------------------------------------------------------------------------|--------------------------------------------------------------------------------------------------------------------------|--------------------------------------------------------------------------|------------|-------------------|------|
| Standard        | 20  | 20 - 24 Year | 11-Jun-19 | No                                                                                                         | No                                                                                                                         | No                                                                                                                 | No                                                                                        | No                                                                                                 | No                                                                              | No                                                                                                                       | No                                                                       | 0          | 0                 | None |
| Standard        | 30  | 30 - 34 Year | 20-May-19 | No                                                                                                         | No                                                                                                                         | No                                                                                                                 | No                                                                                        | No                                                                                                 | No                                                                              | No                                                                                                                       | No                                                                       | 0          | 0                 | None |
| Standard        | 21  | 20 - 24 Year | 27-May-19 | No                                                                                                         | No                                                                                                                         | No                                                                                                                 | No                                                                                        | No                                                                                                 | No                                                                              | No                                                                                                                       | No                                                                       | 0          | 0                 | None |
| STI             | 36  | 35 - 39 Year | 27-May-19 | No                                                                                                         | No                                                                                                                         | No                                                                                                                 | No                                                                                        | No                                                                                                 | No                                                                              | No                                                                                                                       | No                                                                       | 0          | 0                 | None |
| Standard        | 41  | 40 - 44 Year | 28-May-19 | No                                                                                                         | No                                                                                                                         | No                                                                                                                 | No                                                                                        | No                                                                                                 | No                                                                              | No                                                                                                                       | No                                                                       | 0          | 0                 | None |
| Standard        | 18  | 15 - 19 Year | 28-May-19 | No                                                                                                         | No                                                                                                                         | No                                                                                                                 | No                                                                                        | No                                                                                                 | No                                                                              | No                                                                                                                       | No                                                                       | 0          | 0                 | None |
| STI             | 22  | 20 - 24 Year | 28-May-19 | No                                                                                                         | No                                                                                                                         | No                                                                                                                 | No                                                                                        | No                                                                                                 | No                                                                              | No                                                                                                                       | No                                                                       | 0          | 0                 | None |
| Standard        | 18  | 15 - 19 Year | 29-May-19 | No                                                                                                         | No                                                                                                                         | No                                                                                                                 | No                                                                                        | No                                                                                                 | No                                                                              | No                                                                                                                       | No                                                                       | 0          | 0                 | None |
| STI             | 42  | 40 - 44 Year | 29-May-19 | No                                                                                                         | No                                                                                                                         | No                                                                                                                 | No                                                                                        | No                                                                                                 | No                                                                              | No                                                                                                                       | No                                                                       | 0          | 0                 | None |

|          |    |              |             |    |    |    |    |    |    |    |    |   |   |      |
|----------|----|--------------|-------------|----|----|----|----|----|----|----|----|---|---|------|
| Standard | 30 | 30 - 34 Year | 31- May -19 | No | 0 | 0 | None |
| Standard | 18 | 15 - 19 Year | 20- May -19 | No | 0 | 0 | None |
| STI      | 48 | 45 -49 Years | 20- May -19 | No | 0 | 0 | None |
| Standard | 47 | 45 -49 Year  | 20- May -19 | No | 0 | 0 | None |
| Standard | 25 | 25 - 29 Year | 20- May -19 | No | 0 | 0 | None |
| Standard | 22 | 20 - 24 Year | 20- May -19 | No | 0 | 0 | None |
| Standard | 24 | 20 - 24 Year | 20- May -19 | No | 0 | 0 | None |
| Standard | 25 | 25 - 29 Year | 20- May -19 | No | 0 | 0 | None |
| Standard | 19 | 15 - 19 Year | 20- May -19 | No | 0 | 0 | None |
| Standard | 33 | 30 - 34 Year | 7- May -19  | No | 0 | 0 | None |
| Standard | 34 | 30 - 34 Year | 7- May -19  | No | 0 | 0 | None |
| Standard | 20 | 20 - 24 Year | 8- May -19  | No | 0 | 0 | None |
| STI      | 17 | 15 - 19 Year | 8- May -19  | No | 0 | 0 | None |
| Standard | 18 | 15 - 19 Year | 8- May -19  | No | 0 | 0 | None |
| Standard | 18 | 15 - 19 Year | 8- May -19  | No | 0 | 0 | None |

|          |    |              |             |    |    |    |    |    |    |    |    |   |   |      |
|----------|----|--------------|-------------|----|----|----|----|----|----|----|----|---|---|------|
| Standard | 23 | 20 - 24 Year | 8- May -19  | No | 0 | 0 | None |
| Standard | 27 | 25 - 29 Year | 9- May -19  | No | 0 | 0 | None |
| Standard | 17 | 15 - 19 Year | 9- May -19  | No | 0 | 0 | None |
| Standard | 39 | 35 - 39 Year | 10- May -19 | No | 0 | 0 | None |
| Standard | 19 | 15 - 19 Year | 10- May -19 | No | 0 | 0 | None |
| Standard | 18 | 15 - 19 Year | 3- May -19  | No | 0 | 0 | None |
| Standard | 20 | 20 - 24 Year | 3- May -19  | No | 0 | 0 | None |
| Standard | 27 | 25 - 29 Year | 29- Apr-19  | No | 0 | 0 | None |
| Standard | 21 | 20 - 24 Year | 29- Apr-19  | No | 0 | 0 | None |
| Standard | 25 | 25 - 29 Year | 30- Apr-19  | No | 0 | 0 | None |
| Standard | 15 | 15 - 19 Year | 30- May -19 | No | 0 | 0 | None |
| Standard | 25 | 25 - 29 Year | 1- May -19  | No | 0 | 0 | None |
| Standard | 43 | 40 - 44 Year | 2- May -19  | No | 0 | 0 | None |
| Standard | 26 | 25 - 29 Year | 2- May -19  | No | 0 | 0 | None |
| Standard | 33 | 30 - 34 Year | 26- Apr-19  | No | 0 | 0 | None |

|          |    |              |            |    |    |    |    |    |    |    |    |   |   |      |
|----------|----|--------------|------------|----|----|----|----|----|----|----|----|---|---|------|
| Standard | 19 | 15 - 19 Year | 25- Apr-19 | No | 0 | 0 | None |
| Standard | 19 | 15 - 19 Year | 25- Apr-19 | No | 0 | 0 | None |
| Standard | 33 | 30 - 34 Year | 24- Apr-19 | No | 0 | 0 | None |
| Standard | 20 | 20 - 24 Year | 24- Apr-19 | No | 0 | 0 | None |
| Standard | 21 | 20 - 24 Year | 6- Jun-19  | No | 0 | 0 | None |
| Standard | 35 | 35 - 39 Year | 6- Jun-19  | No | 0 | 0 | None |
| Standard | 21 | 20 - 24 Year | 6- Jun-19  | No | 0 | 0 | None |
| Standard | 28 | 25 - 29 Year | 7- Jun-19  | No | 0 | 0 | None |
| Standard | 21 | 20 - 24 Year | 7- Jun-19  | No | 0 | 0 | None |
| Standard | 20 | 20 - 24 Year | 7- Jun-19  | No | 0 | 0 | None |
| Standard | 23 | 20 - 24 Year | 7- Jun-19  | No | 0 | 0 | None |
| Standard | 28 | 25 - 29 Year | 3- Jun-19  | No | 0 | 0 | None |
| Standard | 23 | 20 - 24 Year | 3- Jun-19  | No | 0 | 0 | None |
| Standard | 24 | 20 - 24 Year | 3- Jun-19  | No | 0 | 0 | None |
| Standard | 35 | 35 - 39 Year | 15- Apr-19 | No | 0 | 0 | None |



|          |    |              |            |    |    |    |    |    |    |    |    |   |   |      |
|----------|----|--------------|------------|----|----|----|----|----|----|----|----|---|---|------|
| Standard | 20 | 20 - 24 Year | 15- Apr-19 | No | 0 | 0 | None |
| STI      | 28 | 25 - 29 Year | 15- Apr-19 | No | 0 | 0 | None |
| Standard | 21 | 20 - 24 Year | 13- Apr-19 | No | 0 | 0 | None |
| Standard | 20 | 20 - 24 Year | 12- Apr-19 | No | 0 | 0 | None |
| Standard | 23 | 20 - 24 Year | 12- Apr-19 | No | 0 | 0 | None |
| Standard | 20 | 20 - 24 Year | 12- Apr-19 | No | 0 | 0 | None |
| STI      | 20 | 20 - 24 Year | 12- Apr-19 | No | 0 | 0 | None |
| Standard | 25 | 25 - 29 Year | 12- Apr-19 | No | 0 | 0 | None |
| Standard | 41 | 40 - 44 Year | 12- Apr-19 | No | 0 | 0 | None |
| Standard | 32 | 30 - 34 Year | 12- Apr-19 | No | 0 | 0 | None |
| Standard | 20 | 20 - 24 Year | 11- Apr-19 | No | 0 | 0 | None |
| Standard | 18 | 15 - 19 Year | 11- Apr-19 | No | 0 | 0 | None |
| Standard | 20 | 20 - 24 Year | 11- Apr-19 | No | 0 | 0 | None |
| Standard | 27 | 25 - 29 Year | 11- Apr-19 | No | 0 | 0 | None |
| Standard | 27 | 25 - 29 Year | 11- Apr-19 | No | 0 | 0 | None |

|          |    |              |            |    |    |    |    |    |    |    |     |   |   |      |
|----------|----|--------------|------------|----|----|----|----|----|----|----|-----|---|---|------|
| Standard | 18 | 15 - 19 Year | 11- Apr-19 | No  | 0 | 0 | None |
| Standard | 33 | 30 - 34 Year | 10- Apr-19 | No | Yes | 0 | 0 | None |
| Standard | 21 | 20 - 24 Year | 10- Apr-19 | No | Yes | 0 | 0 | None |
| Standard | 35 | 35 - 39 Year | 10- Apr-19 | No | Yes | 0 | 0 | None |
| Standard | 37 | 35 - 39 Year | 8- Apr-19  | No  | 0 | 0 | None |
| Standard | 18 | 15 - 19 Year | 8- Apr-19  | No  | 0 | 0 | None |
| Standard | 26 | 25 - 29 Year | 8- Apr-19  | No  | 0 | 0 | None |
| Standard | 21 | 20 - 24 Year | 8- Apr-19  | No  | 0 | 0 | None |
| Standard | 25 | 25 - 29 Year | 9- Apr-19  | No  | 0 | 0 | None |
| Standard | 27 | 25 - 29 Year | 9- Apr-19  | No  | 0 | 0 | None |
| Standard | 19 | 15 - 19 Year | 9- Apr-19  | No  | 0 | 0 | None |
| Standard | 18 | 15 - 19 Year | 9- Apr-19  | No  | 0 | 0 | None |
| Standard | 17 | 15 - 19 Year | 9- Apr-19  | No  | 0 | 0 | None |
| Standard | 21 | 20 - 24 Year | 9- Apr-19  | No  | 0 | 0 | None |
| Standard | 25 | 25 - 29 Year | 9- Apr-19  | No  | 0 | 0 | None |

|          |    |              |             |    |    |    |    |    |    |    |    |   |   |      |
|----------|----|--------------|-------------|----|----|----|----|----|----|----|----|---|---|------|
| STI      | 35 | 35 - 39 Year | 2- Apr-19   | No | 0 | 0 | None |
| Standard | 19 | 15 - 19 Year | 3- Apr-19   | No | 0 | 0 | None |
| Standard | 19 | 15 - 19 Year | 4- Apr-19   | No | 0 | 0 | None |
| Standard | 21 | 20 - 24 Year | 4- Apr-19   | No | 0 | 0 | None |
| STI      | 25 | 25 - 29 Year | 25- Mar -19 | No | 0 | 0 | None |
| Standard | 20 | 20 - 24 Year | 26- Mar -19 | No | 0 | 0 | None |
| Standard | 35 | 35 - 39 Year | 21- Mar -19 | No | 0 | 0 | None |
| Standard | 27 | 25 - 29 Year | 28- Mar -19 | No | 0 | 0 | None |
| Standard | 35 | 35 - 39 Year | 22- Mar -19 | No | 0 | 0 | None |
| Standard | 33 | 30 - 34 Year | 19- Mar -19 | No | 0 | 0 | None |
| Standard | 20 | 20 - 24 Year | 25- Mar -19 | No | 0 | 0 | None |
| Standard | 21 | 20 - 24 Year | 25- Mar -19 | No | 0 | 0 | None |
| Standard | 41 | 40 - 44 Year | 25- Mar -19 | No | 0 | 0 | None |
| Standard | 20 | 20 - 24 Year | 26- Mar -19 | No | 0 | 0 | None |
| Standard | 19 | 15 - 19 Year | 29- Mar -19 | No | 0 | 0 | None |

|          |    |              |             |    |    |    |    |    |    |    |    |   |   |      |
|----------|----|--------------|-------------|----|----|----|----|----|----|----|----|---|---|------|
| Standard | 32 | 30 - 34 Year | 14- Mar -19 | No | 0 | 0 | None |
| Standard | 27 | 25 - 29 Year | 14- Mar -19 | No | 0 | 0 | None |
| Standard | 10 | 10 - 14 Year | 13- Mar -19 | No | 0 | 0 | None |
| Standard | 32 | 30 - 34 Year | 13- Mar -19 | No | 0 | 0 | None |
| Standard | 24 | 20 - 24 Year | 13- Mar -19 | No | 0 | 0 | None |
| Standard | 18 | 15 - 19 Year | 13- Mar -19 | No | 0 | 0 | None |
| Standard | 18 | 15 - 19 Year | 12- Mar -19 | No | 0 | 0 | None |
| Standard | 21 | 20 - 24 Year | 12- Mar -19 | No | 0 | 0 | None |
| Standard | 16 | 15 - 19 Year | 11- Mar -19 | No | 0 | 0 | None |
| Standard | 19 | 15 - 19 Year | 11- Mar -19 | No | 0 | 0 | None |
| Standard | 27 | 25 - 29 Year | 11- Mar -19 | No | 0 | 0 | None |
| Standard | 21 | 20 - 24 Year | 11- Mar -19 | No | 0 | 0 | None |
| Standard | 36 | 35 - 39 Year | 11- Mar -19 | No | 0 | 0 | None |
| Standard | 37 | 35 - 39 Year | 11- Mar -19 | No | 0 | 0 | None |
| Standard | 23 | 20 - 24 Year | 12- Mar -19 | No | 0 | 0 | None |

|          |    |              |             |     |    |    |    |    |    |    |     |   |   |      |
|----------|----|--------------|-------------|-----|----|----|----|----|----|----|-----|---|---|------|
| Standard | 23 | 20 - 24 Year | 13- Mar -19 | No  | No | No | No | No | No | No | No  | 0 | 0 | None |
| Standard | 31 | 30 - 34 Year | 13- Mar -19 | No  | No | No | No | No | No | No | No  | 0 | 0 | None |
| STI      | 26 | 25 - 29 Year | 2- Apr- 19  | No  | No | No | No | No | No | No | No  | 0 | 0 | None |
| Standard | 44 | 40 - 44 Year | 10- Apr- 19 | No  | No | No | No | No | No | No | No  | 0 | 0 | None |
| Standard | 24 | 20 - 24 Year | 8- Apr- 19  | No  | No | No | No | No | No | No | No  | 0 | 0 | None |
| Standard | 40 | 40 - 44 Year | 28- May -19 | Yes | No | No | No | No | No | No | Yes | 1 | 1 | Low  |
| Standard | 27 | 25 - 29 Year | 31- May -19 | Yes | No | No | No | No | No | No | Yes | 1 | 1 | Low  |
| Standard | 23 | 20 - 24 Year | 3- May -19  | Yes | No | No | No | No | No | No | Yes | 1 | 1 | Low  |
| Standard | 36 | 35 - 39 Year | 3- May -19  | Yes | No | No | No | No | No | No | Yes | 1 | 1 | Low  |
| Standard | 39 | 35 - 39 Year | 29- Apr- 19 | Yes | No | No | No | No | No | No | Yes | 1 | 1 | Low  |
| Standard | 30 | 30 - 34 Year | 25- Apr- 19 | Yes | No | No | No | No | No | No | Yes | 1 | 1 | Low  |
| Standard | 37 | 35 - 39 Year | 24- Apr- 19 | Yes | No | No | No | No | No | No | Yes | 1 | 1 | Low  |
| Standard | 21 | 20 - 24 Year | 4- Apr- 19  | Yes | No | No | No | No | No | No | Yes | 1 | 1 | Low  |
| Standard | 28 | 25 - 29 Year | 19- Mar -19 | Yes | No | No | No | No | No | No | Yes | 1 | 1 | Low  |
| Standard | 29 | 25 - 29 Year | 11- Mar -19 | Yes | No | No | No | No | No | No | Yes | 1 | 1 | Low  |

|          |    |              |             |    |     |     |    |    |    |    |     |   |   |     |
|----------|----|--------------|-------------|----|-----|-----|----|----|----|----|-----|---|---|-----|
| STI      | 24 | 20 - 24 Year | 14- Mar -19 | No | Yes | No  | No | No | No | No | Yes | 1 | 1 | Low |
| Standard | 40 | 40 - 44 Year | 3- Jun- 19  | No | No  | Yes | No | No | No | No | Yes | 1 | 1 | Low |
| Standard | 25 | 25 - 29 Year | 27- May -19 | No | No  | Yes | No | No | No | No | Yes | 1 | 1 | Low |
| Standard | 27 | 25 - 29 Year | 29- May -19 | No | No  | Yes | No | No | No | No | Yes | 1 | 1 | Low |
| Standard | 22 | 20 - 24 Year | 30- May -19 | No | No  | Yes | No | No | No | No | Yes | 1 | 1 | Low |
| Standard | 34 | 30 - 34 Year | 8- May -19  | No | No  | Yes | No | No | No | No | Yes | 1 | 1 | Low |
| Standard | 26 | 25 - 29 Year | 9- May -19  | No | No  | Yes | No | No | No | No | Yes | 1 | 1 | Low |
| Standard | 28 | 25 - 29 Year | 17- Apr- 19 | No | No  | Yes | No | No | No | No | Yes | 1 | 1 | Low |
| Standard | 22 | 20 - 24 Year | 14- Apr- 19 | No | No  | Yes | No | No | No | No | Yes | 1 | 1 | Low |
| Standard | 21 | 20 - 24 Year | 12- Apr- 19 | No | No  | Yes | No | No | No | No | Yes | 1 | 1 | Low |
| STI      | 24 | 20 - 24 Year | 11- Apr- 19 | No | No  | Yes | No | No | No | No | Yes | 1 | 1 | Low |
| Standard | 21 | 20 - 24 Year | 11- Apr- 19 | No | No  | Yes | No | No | No | No | Yes | 1 | 1 | Low |
| Standard | 25 | 25 - 29 Year | 8- Apr- 19  | No | No  | Yes | No | No | No | No | Yes | 1 | 1 | Low |
| Standard | 24 | 20 - 24 Year | 20- Mar -19 | No | No  | Yes | No | No | No | No | Yes | 1 | 1 | Low |
| Standard | 25 | 25 - 29 Year | 19- Mar -19 | No | No  | Yes | No | No | No | No | Yes | 1 | 1 | Low |

|          |    |              |             |    |    |     |     |     |    |    |     |   |   |     |
|----------|----|--------------|-------------|----|----|-----|-----|-----|----|----|-----|---|---|-----|
| Standard | 21 | 20 - 24 Year | 19- Mar -19 | No | No | Yes | No  | No  | No | No | Yes | 1 | 1 | Low |
| ANC      | 41 | 40 - 44 Year | 19- Mar -19 | No | No | Yes | No  | No  | No | No | Yes | 1 | 1 | Low |
| STI      | 22 | 20 - 24 Year | 21- Mar -19 | No | No | Yes | No  | No  | No | No | Yes | 1 | 1 | Low |
| Standard | 36 | 35 - 39 Year | 22- Mar -19 | No | No | Yes | No  | No  | No | No | Yes | 1 | 1 | Low |
| Standard | 19 | 15 - 19 Year | 25- Mar -19 | No | No | Yes | No  | No  | No | No | Yes | 1 | 1 | Low |
| Standard | 31 | 30 - 34 Year | 27- Mar -19 | No | No | Yes | No  | No  | No | No | Yes | 1 | 1 | Low |
| Standard | 19 | 15 - 19 Year | 11- Mar -19 | No | No | Yes | No  | No  | No | No | Yes | 1 | 1 | Low |
| Standard | 27 | 25 - 29 Year | 11- Mar -19 | No | No | Yes | No  | No  | No | No | Yes | 1 | 1 | Low |
| Standard | 20 | 20 - 24 Year | 11- Mar -19 | No | No | Yes | No  | No  | No | No | Yes | 1 | 1 | Low |
| Standard | 36 | 35 - 39 Year | 12- Mar -19 | No | No | Yes | No  | No  | No | No | Yes | 1 | 1 | Low |
| Standard | 18 | 15 - 19 Year | 19- Mar -19 | No | No | Yes | No  | No  | No | No | Yes | 1 | 1 | Low |
| Standard | 18 | 15 - 19 Year | 25- Apr-19  | No | No | No  | Yes | No  | No | No | Yes | 1 | 1 | Low |
| Standard | 20 | 20 - 24 Year | 2- Apr-19   | No | No | No  | Yes | No  | No | No | Yes | 1 | 1 | Low |
| Standard | 43 | 40 - 44 Year | 2- Apr-19   | No | No | No  | Yes | No  | No | No | Yes | 1 | 1 | Low |
| Standard | 46 | 45 -49 Year  | 4- Apr-19   | No | No | No  | No  | Yes | No | No | Yes | 1 | 1 | Low |

|          |    |              |            |    |    |    |    |    |     |     |     |   |   |     |
|----------|----|--------------|------------|----|----|----|----|----|-----|-----|-----|---|---|-----|
| Standard | 36 | 35 - 39 Year | 24- Apr-19 | No | No | No | No | No | Yes | No  | Yes | 1 | 1 | Low |
| Standard | 30 | 30 - 34 Year | 3- Jun-19  | No | No | No | No | No | Yes | No  | Yes | 1 | 1 | Low |
| Standard | 24 | 20 - 24 Year | 3- Jun-19  | No | No | No | No | No | No  | Yes | Yes | 1 | 1 | Low |
| Standard | 22 | 20 - 24 Year | 3- Jun-19  | No | No | No | No | No | No  | Yes | Yes | 1 | 1 | Low |
| STI      | 21 | 20 - 24 Year | 3- May-19  | No | No | No | No | No | No  | Yes | Yes | 1 | 1 | Low |
| Standard | 25 | 25 - 29 Year | 3- May-19  | No | No | No | No | No | No  | Yes | Yes | 1 | 1 | Low |
| STI      | 25 | 25 - 29 Year | 2- May-19  | No | No | No | No | No | No  | Yes | Yes | 1 | 1 | Low |
| Standard | 18 | 15 - 19 Year | 25- Apr-19 | No | No | No | No | No | No  | Yes | Yes | 1 | 1 | Low |
| Standard | 19 | 15 - 19 Year | 25- Apr-19 | No | No | No | No | No | No  | Yes | Yes | 1 | 1 | Low |
| Standard | 27 | 25 - 29 Year | 6- Jun-19  | No | No | No | No | No | No  | Yes | Yes | 1 | 1 | Low |
| Standard | 24 | 20 - 24 Year | 11- Jun-19 | No | No | No | No | No | No  | Yes | Yes | 1 | 1 | Low |
| Standard | 24 | 20 - 24 Year | 7- Jun-19  | No | No | No | No | No | No  | Yes | Yes | 1 | 1 | Low |
| Standard | 19 | 15 - 19 Year | 4- Jun-19  | No | No | No | No | No | No  | Yes | Yes | 1 | 1 | Low |
| Standard | 18 | 15 - 19 Year | 10- Jun-19 | No | No | No | No | No | No  | Yes | Yes | 1 | 1 | Low |
| STI      | 19 | 15 - 19 Year | 4- Apr-19  | No | No | No | No | No | No  | Yes | Yes | 1 | 1 | Low |



|          |    |              |             |     |    |     |    |     |              |     |     |   |   |     |
|----------|----|--------------|-------------|-----|----|-----|----|-----|--------------|-----|-----|---|---|-----|
| Standard | 37 | 35 - 39 Year | 4- Apr-19   | No  | No | No  | No | No  | No           | Yes | Yes | 1 | 1 | Low |
| Standard | 20 | 20 - 24 Year | 27- Mar -19 | No  | No | No  | No | No  | No           | Yes | Yes | 1 | 1 | Low |
| Standard | 27 | 25 - 29 Year | 26- Mar -19 | No  | No | No  | No | No  | No           | Yes | Yes | 1 | 1 | Low |
| Standard | 19 | 15 - 19 Year | 12- Mar -19 | No  | No | No  | No | No  | No           | Yes | Yes | 1 | 1 | Low |
| Standard | 19 | 15 - 19 Year | 11- Mar -19 | No  | No | No  | No | No  | No           | Yes | Yes | 1 | 1 | Low |
| Standard | 21 | 20 - 24 Year | 3- Apr-19   | No  | No | No  | No | No  | No           | Yes | Yes | 1 | 1 | Low |
| Standard | 23 | 20 - 24 Year | 3- Jun-19   | No  | No | No  | No | No  | Refused to A | Yes | Yes | 1 | 1 | Low |
| Standard | 38 | 35 - 39 Year | 2- May -19  | Yes | No | Yes | No | No  | No           | No  | Yes | 2 | 1 | Low |
| Standard | 46 | 45 -49 Year  | 1- May -19  | Yes | No | Yes | No | No  | No           | No  | Yes | 2 | 1 | Low |
| Standard | 31 | 30 - 34 Year | 26- Apr-19  | Yes | No | Yes | No | No  | No           | No  | Yes | 2 | 1 | Low |
| Standard | 33 | 30 - 34 Year | 20- Mar -19 | Yes | No | Yes | No | No  | No           | No  | Yes | 2 | 1 | Low |
| Standard | 22 | 20 - 24 Year | 12- Mar -19 | Yes | No | Yes | No | No  | No           | No  | Yes | 2 | 1 | Low |
| Standard | 35 | 35 - 39 Year | 11- Mar -19 | Yes | No | Yes | No | No  | No           | No  | Yes | 2 | 1 | Low |
| Standard | 21 | 20 - 24 Year | 27- May -19 | No  | No | Yes | No | Yes | No           | No  | Yes | 2 | 1 | Low |
| Standard | 25 | 25 - 29 Year | 27- May -19 | No  | No | Yes | No | Yes | No           | No  | Yes | 2 | 1 | Low |

|          |    |              |             |    |    |     |    |     |    |    |     |   |   |     |
|----------|----|--------------|-------------|----|----|-----|----|-----|----|----|-----|---|---|-----|
| Standard | 25 | 25 - 29 Year | 27- May -19 | No | No | Yes | No | Yes | No | No | Yes | 2 | 1 | Low |
| Standard | 37 | 35 - 39 Year | 27- May -19 | No | No | Yes | No | Yes | No | No | Yes | 2 | 1 | Low |
| STI      | 26 | 25 - 29 Year | 28- May -19 | No | No | Yes | No | Yes | No | No | Yes | 2 | 1 | Low |
| Standard | 23 | 20 - 24 Year | 28- May -19 | No | No | Yes | No | Yes | No | No | Yes | 2 | 1 | Low |
| Standard | 22 | 20 - 24 Year | 30- May -19 | No | No | Yes | No | Yes | No | No | Yes | 2 | 1 | Low |
| Standard | 24 | 20 - 24 Year | 30- May -19 | No | No | Yes | No | Yes | No | No | Yes | 2 | 1 | Low |
| Standard | 17 | 15 - 19 Year | 31- May -19 | No | No | Yes | No | Yes | No | No | Yes | 2 | 1 | Low |
| Standard | 36 | 35 - 39 Year | 7- May -19  | No | No | Yes | No | Yes | No | No | Yes | 2 | 1 | Low |
| Standard | 38 | 35 - 39 Year | 8- May -19  | No | No | Yes | No | Yes | No | No | Yes | 2 | 1 | Low |
| Standard | 19 | 15 - 19 Year | 8- May -19  | No | No | Yes | No | Yes | No | No | Yes | 2 | 1 | Low |
| Standard | 21 | 20 - 24 Year | 9- May -19  | No | No | Yes | No | Yes | No | No | Yes | 2 | 1 | Low |
| Standard | 24 | 20 - 24 Year | 9- May -19  | No | No | Yes | No | Yes | No | No | Yes | 2 | 1 | Low |
| Standard | 20 | 20 - 24 Year | 10- May -19 | No | No | Yes | No | Yes | No | No | Yes | 2 | 1 | Low |
| Standard | 29 | 30 - 34 Year | 11- May -19 | No | No | Yes | No | Yes | No | No | Yes | 2 | 1 | Low |
| Standard | 30 | 30 - 34 Year | 11- May -19 | No | No | Yes | No | Yes | No | No | Yes | 2 | 1 | Low |

|          |    |              |            |    |    |     |    |     |    |    |     |   |   |     |
|----------|----|--------------|------------|----|----|-----|----|-----|----|----|-----|---|---|-----|
| Standard | 18 | 15 - 19 Year | 17- Apr-19 | No | No | Yes | No | Yes | No | No | Yes | 2 | 1 | Low |
| Standard | 21 | 20 - 24 Year | 17- Apr-19 | No | No | Yes | No | Yes | No | No | Yes | 2 | 1 | Low |
| Standard | 23 | 20 - 24 Year | 17- Apr-19 | No | No | Yes | No | Yes | No | No | Yes | 2 | 1 | Low |
| Standard | 34 | 30 - 34 Year | 16- Apr-19 | No | No | Yes | No | Yes | No | No | Yes | 2 | 1 | Low |
| Standard | 18 | 15 - 19 Year | 15- Apr-19 | No | No | Yes | No | Yes | No | No | Yes | 2 | 1 | Low |
| Standard | 18 | 15 - 19 Year | 15- Apr-19 | No | No | Yes | No | Yes | No | No | Yes | 2 | 1 | Low |
| Standard | 24 | 20 - 24 Year | 15- Apr-19 | No | No | Yes | No | Yes | No | No | Yes | 2 | 1 | Low |
| Standard | 38 | 35 - 39 Year | 15- Apr-19 | No | No | Yes | No | Yes | No | No | Yes | 2 | 1 | Low |
| Standard | 22 | 20 - 24 Year | 11- Apr-19 | No | No | Yes | No | Yes | No | No | Yes | 2 | 1 | Low |
| Standard | 22 | 20 - 24 Year | 11- Apr-19 | No | No | Yes | No | Yes | No | No | Yes | 2 | 1 | Low |
| STI      | 19 | 15 - 19 Year | 11- Apr-19 | No | No | Yes | No | Yes | No | No | Yes | 2 | 1 | Low |
| Standard | 24 | 20 - 24 Year | 11- Apr-19 | No | No | Yes | No | Yes | No | No | Yes | 2 | 1 | Low |
| Standard | 19 | 15 - 19 Year | 10- Apr-19 | No | No | Yes | No | Yes | No | No | Yes | 2 | 1 | Low |
| Standard | 20 | 20 - 24 Year | 10- Apr-19 | No | No | Yes | No | Yes | No | No | Yes | 2 | 1 | Low |
| Standard | 16 | 15 - 19 Year | 8- Apr-19  | No | No | Yes | No | Yes | No | No | Yes | 2 | 1 | Low |

|          |    |              |            |    |    |     |    |     |    |    |     |   |   |     |
|----------|----|--------------|------------|----|----|-----|----|-----|----|----|-----|---|---|-----|
| Standard | 18 | 15 - 19 Year | 9- Apr-19  | No | No | Yes | No | Yes | No | No | Yes | 2 | 1 | Low |
| Standard | 19 | 15 - 19 Year | 4- Apr-19  | No | No | Yes | No | Yes | No | No | Yes | 2 | 1 | Low |
| Standard | 23 | 20 - 24 Year | 9- Apr-19  | No | No | Yes | No | Yes | No | No | Yes | 2 | 1 | Low |
| Standard | 19 | 15 - 19 Year | 9- Apr-19  | No | No | Yes | No | Yes | No | No | Yes | 2 | 1 | Low |
| STI      | 30 | 30 - 34 Year | 5- Apr-19  | No | No | Yes | No | Yes | No | No | Yes | 2 | 1 | Low |
| Standard | 20 | 20 - 24 Year | 5- Apr-19  | No | No | Yes | No | Yes | No | No | Yes | 2 | 1 | Low |
| Standard | 17 | 15 - 19 Year | 5- Apr-19  | No | No | Yes | No | Yes | No | No | Yes | 2 | 1 | Low |
| Standard | 23 | 20 - 24 Year | 8- Apr-19  | No | No | Yes | No | Yes | No | No | Yes | 2 | 1 | Low |
| Standard | 28 | 25 - 29 Year | 25- Mar-19 | No | No | Yes | No | Yes | No | No | Yes | 2 | 1 | Low |
| Standard | 26 | 25 - 29 Year | 29- Mar-19 | No | No | Yes | No | Yes | No | No | Yes | 2 | 1 | Low |
| Standard | 24 | 20 - 24 Year | 20- Mar-19 | No | No | Yes | No | Yes | No | No | Yes | 2 | 1 | Low |
| Standard | 25 | 25 - 29 Year | 22- Mar-19 | No | No | Yes | No | Yes | No | No | Yes | 2 | 1 | Low |
| Standard | 24 | 20 - 24 Year | 19- Mar-19 | No | No | Yes | No | Yes | No | No | Yes | 2 | 1 | Low |
| Standard | 18 | 15 - 19 Year | 20- Mar-19 | No | No | Yes | No | Yes | No | No | Yes | 2 | 1 | Low |
| Standard | 24 | 20 - 24 Year | 20- Mar-19 | No | No | Yes | No | Yes | No | No | Yes | 2 | 1 | Low |

|          |    |              |             |     |    |     |     |     |     |     |     |   |   |     |
|----------|----|--------------|-------------|-----|----|-----|-----|-----|-----|-----|-----|---|---|-----|
| Standard | 28 | 25 - 29 Year | 21- Mar -19 | No  | No | Yes | No  | Yes | No  | No  | Yes | 2 | 1 | Low |
| Standard | 49 | 45 -49 Year  | 29- Mar -19 | No  | No | Yes | No  | Yes | No  | No  | Yes | 2 | 1 | Low |
| Standard | 19 | 15 - 19 Year | 29- May -19 | No  | No | Yes | No  | Yes | No  | No  | Yes | 2 | 1 | Low |
| Standard | 23 | 20 - 24 Year | 11- Mar -19 | No  | No | Yes | No  | Yes | No  | No  | Yes | 2 | 1 | Low |
| STI      | 45 | 45 -49 Year  | 20- Mar -19 | No  | No | Yes | No  | Yes | No  | No  | Yes | 2 | 1 | Low |
| STI      | 23 | 20 - 24 Year | 8- Apr- 19  | No  | No | Yes | No  | Yes | No  | No  | Yes | 2 | 1 | Low |
| Standard | 19 | 15 - 19 Year | 5- Apr- 19  | No  | No | Yes | No  | Yes | No  | No  | Yes | 2 | 1 | Low |
| Standard | 21 | 20 - 24 Year | 4- Apr- 19  | No  | No | Yes | No  | Yes | No  | No  | Yes | 2 | 1 | Low |
| Standard | 26 | 25 - 29 Year | 22- Mar -19 | No  | No | Yes | No  | Yes | No  | No  | Yes | 2 | 1 | Low |
| Standard | 33 | 30 - 34 Year | 4- Jun- 19  | No  | No | No  | Yes | Yes | No  | No  | Yes | 2 | 1 | Low |
| Standard | 28 | 25 - 29 Year | 21- Mar -19 | No  | No | No  | Yes | Yes | No  | No  | Yes | 2 | 1 | Low |
| Standard | 28 | 25 - 29 Year | 11- Apr- 19 | No  | No | Yes | No  | No  | Yes | No  | Yes | 2 | 1 | Low |
| STI      | 18 | 15 - 19 Year | 3- Jun- 19  | No  | No | No  | No  | Yes | Yes | No  | Yes | 2 | 1 | Low |
| Standard | 21 | 20 - 24 Year | 3- Jun- 19  | No  | No | No  | No  | Yes | Yes | No  | Yes | 2 | 1 | Low |
| Standard | 24 | 20 - 24 Year | 6- Jun- 19  | Yes | No | No  | No  | No  | No  | Yes | No  | 2 | 1 | Low |

|          |    |              |             |     |     |     |     |     |     |     |     |   |   |      |
|----------|----|--------------|-------------|-----|-----|-----|-----|-----|-----|-----|-----|---|---|------|
| Standard | 24 | 20 - 24 Year | 27- Mar -19 | No  | No  | Yes | No  | No  | No  | Yes | Yes | 2 | 1 | Low  |
| Standard | 29 | 25 - 29 Year | 14- Mar -19 | No  | No  | Yes | No  | No  | No  | Yes | Yes | 2 | 1 | Low  |
| Standard | 28 | 25 - 29 Year | 6- Jun- 19  | No  | No  | No  | No  | Yes | No  | Yes | Yes | 2 | 1 | Low  |
| Standard | 28 | 25 - 29 Year | 11- Jun- 19 | No  | No  | No  | No  | No  | Yes | Yes | Yes | 2 | 1 | Low  |
| Standard | 18 | 15 - 19 Year | 25- Apr- 19 | No  | No  | No  | No  | No  | Yes | Yes | Yes | 2 | 1 | Low  |
| Standard | 34 | 30 - 34 Year | 6- Jun- 19  | No  | No  | No  | No  | No  | Yes | Yes | Yes | 2 | 1 | Low  |
| Standard | 21 | 20 - 24 Year | 6- Jun- 19  | No  | No  | No  | No  | No  | Yes | Yes | Yes | 2 | 1 | Low  |
| Standard | 21 | 20 - 24 Year | 11- Jun- 19 | No  | No  | No  | No  | No  | Yes | Yes | Yes | 2 | 1 | Low  |
| Standard | 23 | 20 - 24 Year | 6- Jun- 19  | No  | No  | No  | No  | No  | Yes | Yes | Yes | 2 | 1 | Low  |
| Standard | 18 | 15 - 19 Year | 11- Jun- 19 | No  | No  | No  | No  | No  | Yes | Yes | Yes | 2 | 1 | Low  |
| Standard | 35 | 35 - 39 Year | 10- Jun- 19 | No  | No  | No  | No  | No  | Yes | Yes | Yes | 2 | 1 | Low  |
| Standard | 30 | 30 - 34 Year | 7- Jun- 19  | No  | No  | No  | No  | No  | Yes | Yes | Yes | 2 | 1 | Low  |
| Standard | 24 | 20 - 24 Year | 3- Jun- 19  | No  | No  | No  | No  | No  | Yes | Yes | Yes | 2 | 1 | Low  |
| Standard | 26 | 25 - 29 Year | 2- May -19  | No  | Yes | Yes | Yes | No  | No  | No  | Yes | 3 | 1 | High |
| Standard | 25 | 25 - 29 Year | 27- May -19 | Yes | No  | Yes | No  | Yes | No  | No  | Yes | 3 | 1 | High |

|          |    |              |             |     |     |     |    |     |     |    |     |   |   |      |
|----------|----|--------------|-------------|-----|-----|-----|----|-----|-----|----|-----|---|---|------|
| STI      | 31 | 30 - 34 Year | 28- May -19 | Yes | No  | Yes | No | Yes | No  | No | Yes | 3 | 1 | High |
| STI      | 18 | 15 - 19 Year | 28- May -19 | Yes | No  | Yes | No | Yes | No  | No | Yes | 3 | 1 | High |
| Standard | 32 | 30 - 34 Year | 28- May -19 | Yes | No  | Yes | No | Yes | No  | No | Yes | 3 | 1 | High |
| Standard | 22 | 20 - 24 Year | 9- May -19  | Yes | No  | Yes | No | Yes | No  | No | Yes | 3 | 1 | High |
| Standard | 24 | 20 - 24 Year | 10- Sep-19  | Yes | No  | Yes | No | Yes | No  | No | Yes | 3 | 1 | High |
| STI      | 27 | 25 - 29 Year | 21- Mar -19 | Yes | No  | Yes | No | Yes | No  | No | Yes | 3 | 1 | High |
| Standard | 31 | 30 - 34 Year | 11- Mar -19 | Yes | No  | Yes | No | Yes | No  | No | Yes | 3 | 1 | High |
| Standard | 31 | 30 - 34 Year | 11- Mar -19 | No  | Yes | Yes | No | Yes | No  | No | Yes | 3 | 1 | High |
| Standard | 26 | 25 - 29 Year | 11- Apr-19  | Yes | No  | Yes | No | No  | Yes | No | Yes | 3 | 1 | High |
| STI      | 30 | 30 - 34 Year | 29- May -19 | No  | No  | Yes | No | Yes | Yes | No | Yes | 3 | 1 | High |
| Standard | 31 | 30 - 34 Year | 29- May -19 | No  | No  | Yes | No | Yes | Yes | No | Yes | 3 | 1 | High |
| Standard | 20 | 20 - 24 Year | 30- May -19 | No  | No  | Yes | No | Yes | Yes | No | Yes | 3 | 1 | High |
| Standard | 25 | 25 - 29 Year | 30- May -19 | No  | No  | Yes | No | Yes | Yes | No | Yes | 3 | 1 | High |
| Standard | 20 | 20 - 24 Year | 31- May -19 | No  | No  | Yes | No | Yes | Yes | No | Yes | 3 | 1 | High |
| Standard | 19 | 15 - 19 Year | 18- Apr-19  | No  | No  | Yes | No | Yes | Yes | No | Yes | 3 | 1 | High |

|          |    |              |            |     |     |              |     |     |     |     |     |     |     |      |
|----------|----|--------------|------------|-----|-----|--------------|-----|-----|-----|-----|-----|-----|-----|------|
| Standard | 18 | 15 - 19 Year | 17- Apr-19 | No  | No  | Yes          | No  | Yes | Yes | No  | Yes | 3   | 1   | High |
| Standard | 37 | 35 - 39 Year | 17- Apr-19 | No  | No  | Yes          | No  | Yes | Yes | No  | Yes | 3   | 1   | High |
| Standard | 26 | 25 - 29 Year | 21- Mar-19 | No  | No  | Yes          | No  | Yes | Yes | No  | Yes | 3   | 1   | High |
| Standard | 20 | 20 - 24 Year | 20- Mar-19 | No  | No  | Yes          | No  | Yes | Yes | No  | Yes | 3   | 1   | High |
| Standard | 32 | 30 - 34 Year | 9- Apr-19  | No  | Yes | Yes          | No  | No  | No  | Yes | Yes | 3   | 1   | High |
| Standard | 22 | 20 - 24 Year | 11- Mar-19 | No  | Yes | Yes          | No  | No  | No  | Yes | Yes | 3   | 1   | High |
| STI      | 24 | 20 - 24 Year | 9- May-19  | No  | No  | Yes          | No  | Yes | No  | Yes | Yes | 3   | 1   | High |
| Standard | 31 | 30 - 34 Year | 10- Jun-19 | No  | No  | No           | Yes | No  | Yes | Yes | Yes | 3   | 1   | High |
| Standard | 31 | 30 - 34 Year | 7- Jun-19  | No  | No  | No           | No  | Yes | Yes | Yes | Yes | 3   | 1   | High |
| Standard | 24 | 20 - 24 Year | 31- May-19 | Yes | No  | Yes          | No  | Yes | Yes | No  | Yes | 4   | 1   | High |
| Standard | 28 | 25 - 29 Year | 7- May-19  | No  | No  | Yes          | No  | Yes | Yes | Yes | Yes | 4   | 1   | High |
| Standard | 24 | 20 - 24 Year | 29- Apr-19 | No  | No  | Refused to A | Yes | Yes | Yes | Yes | Yes | 4   | 1   | High |
|          |    |              |            |     |     |              |     |     |     |     |     | 314 | 172 |      |



Client Risk Behavior Table

| Variable        |          | N assessed on risk | n (%) per Risk Level |               |                |                |                | P-Value |
|-----------------|----------|--------------------|----------------------|---------------|----------------|----------------|----------------|---------|
|                 |          |                    | None                 | 1 Risk Factor | 2 Risk Factors | 3 Risk Factors | 4 Risk Factors |         |
| Age             | < 15     | 1                  | 1 (100.0)            | 0 (0.0)       | 0 (0.0)        | 0 (0.0)        | 0 (0.0)        | 0.732   |
|                 | 15 - 29  | 214                | 87 (40.7)            | 46 (21.5)     | 62 (29.0)      | 16 (7.5)       | 3 (1.4)        |         |
|                 | 30+      | 76                 | 31 (40.8)            | 16 (21.1)     | 19 (25.0)      | 10 (13.2)      | 0 (0.0)        |         |
| Referral Source | Standard | 263                | 109 (41.4)           | 55 (20.9)     | 75 (28.5)      | 21 (8.0)       | 3 (1.1)        | 0.517   |
|                 | STI      | 27                 | 10 (37.0)            | 6 (22.2)      | 6 (22.2)       | 5 (18.5)       | 0 (0.0)        |         |
|                 | ANC      | 1                  | 1 (100.0)            | 0 (0.0)       | 0 (0.0)        | 0 (0.0)        | 0 (0.0)        |         |
